# Supplementary material for: Facilitating functional annotation of chicken microarray data
Source: Springer Nature journal article supplement (doi:10.1186/1471-2105-10-s11-s2), 2009-10-01
Supplement: 12859_2009_3384_MOESM1_ESM.pdf [file 12859_2009_3384_MOESM1_ESM.pdf]

**Additional file 1. Initial assessment of annotation of Affymetrix chicken genome array**

| <b>Data</b>                                        | <b>Chicken</b> | <b>Viruses</b> |
|----------------------------------------------------|----------------|----------------|
| Total number of Probesets                          | 37,703         | 689            |
| Number of transcripts                              | 32,774         | 684            |
| Number of Probesets mapped to gene or gene product | 27,852         | 4              |
| Number of probesets with GO annotation             | 19,272         | 3              |
| Number of annotated gene products                  | 12,457         | 2              |
| Number of annotations                              | 60,621         | 13             |
| IEA annotation (%)                                 | 96             | 54             |

IEA: Code for “Inferred from Electronic Annotation”.
